# Supplementary material
Source: PubMed Central journal article supplement (PMC10600724)
Supplement: jama-e2320134-s004.pdf [file jama-e2320134-s004.pdf]

\*First name, last name, and suffix (if applicable) are required and will appear in PubMed.

| <b>*Group Name(s): The STRESS-L Collaborators</b> |                   |                              |                  |                                      |                                          |                                                         |                                                                                            |
|---------------------------------------------------|-------------------|------------------------------|------------------|--------------------------------------|------------------------------------------|---------------------------------------------------------|--------------------------------------------------------------------------------------------|
| <b>*First Name and Middle Initial(s)</b>          | <b>*Last Name</b> | <b>*Suffix (eg, Jr, III)</b> | Academic Degrees | Institution                          | Location (city, state/province, country) | Role or Contribution, eg, chair, principal investigator | Group (if more than 1 Group listed in the byline) and/or Subgroup (eg, Steering Committee) |
| Tonny                                             | Veenith           |                              | MD               | University Hospitals Birmingham NH   | Birmingham, UK                           | Principal Investigator                                  | Recruiting Site                                                                            |
| Jaimin                                            | Patel             |                              | MD               | University Hospitals Birmingham NH   | Birmingham, UK                           | Sub-Investigator                                        | Recruiting Site                                                                            |
| Nick                                              | Murphy            |                              | MD               | University Hospitals Birmingham NH   | Birmingham, UK                           | Sub-Investigator                                        | Recruiting Site                                                                            |
| Mansoor                                           | Bangash           |                              | MD               | University Hospitals Birmingham NH   | Birmingham, UK                           | Sub-Investigator                                        | Recruiting Site                                                                            |
| Tomasz                                            | Torlinski         |                              | MD               | University Hospitals Birmingham NH   | Birmingham, UK                           | Sub-Investigator                                        | Recruiting Site                                                                            |
| Nicholas                                          | Talbot            |                              | MD               | University Hospitals Birmingham NH   | Birmingham, UK                           | Sub-Investigator                                        | Recruiting Site                                                                            |
| Catherine                                         | Snelson           |                              | MD               | University Hospitals Birmingham NH   | Birmingham, UK                           | Sub-Investigator                                        | Recruiting Site                                                                            |
| Dhruv                                             | Parekh            |                              | MD               | University Hospitals Birmingham NH   | Birmingham, UK                           | Sub-Investigator                                        | Recruiting Site                                                                            |
| Amisha                                            | Desai             |                              |                  | University Hospitals Birmingham NH   | Birmingham, UK                           | Pharmacist                                              | Recruiting Site                                                                            |
| Mary                                              | Kotada            |                              |                  | University Hospitals Birmingham NH   | Birmingham, UK                           | Pharmacist                                              | Recruiting Site                                                                            |
| Yin                                               | May Chin          |                              |                  | University Hospitals Birmingham NH   | Birmingham, UK                           | Pharmacist                                              | Recruiting Site                                                                            |
| Sophie                                            | Holden            |                              |                  | University Hospitals Birmingham NH   | Birmingham, UK                           |                                                         | Recruiting Site                                                                            |
| Aoife                                             | Neal              |                              |                  | University Hospitals Birmingham NH   | Birmingham, UK                           | Research Administrator                                  | Recruiting Site                                                                            |
| Maximina                                          | Ventura           |                              |                  | University Hospitals Birmingham NH   | Birmingham, UK                           | Research Administrator                                  | Recruiting Site                                                                            |
| Martin                                            | Pope              |                              |                  | University Hospitals Birmingham NH   | Birmingham, UK                           | Research Administrator                                  | Recruiting Site                                                                            |
| Samantha                                          | Harkett           |                              |                  | University Hospitals Birmingham NH   | Birmingham, UK                           | Research Nurse                                          | Recruiting Site                                                                            |
| Christopher                                       | McGhee            |                              |                  | University Hospitals Birmingham NH   | Birmingham, UK                           | Research Nurse                                          | Recruiting Site                                                                            |
| Emma                                              | Fellows           |                              |                  | University Hospitals Birmingham NH   | Birmingham, UK                           | Research Nurse                                          | Recruiting Site                                                                            |
| Amy                                               | Bamford           |                              |                  | University Hospitals Birmingham NH   | Birmingham, UK                           | Research Nurse                                          | Recruiting Site                                                                            |
| Ronald                                            | Carrera           |                              |                  | University Hospitals Birmingham NH   | Birmingham, UK                           | Research Nurse                                          | Recruiting Site                                                                            |
| Karen                                             | Ellis             |                              |                  | University Hospitals Birmingham NH   | Birmingham, UK                           | Research Nurse                                          | Recruiting Site                                                                            |
| Elaine                                            | Spruce            |                              |                  | University Hospitals Birmingham NH   | Birmingham, UK                           | Research Nurse                                          | Recruiting Site                                                                            |
| Liesl                                             | Despy             |                              |                  | University Hospitals Birmingham NH   | Birmingham, UK                           | Research Nurse                                          | Recruiting Site                                                                            |
| Stephanie                                         | Porter            |                              |                  | University Hospitals Birmingham NH   | Birmingham, UK                           | Research Nurse                                          | Recruiting Site                                                                            |
| Colin                                             | Bergin            |                              |                  | University Hospitals Birmingham NH   | Birmingham, UK                           | Research Nurse                                          | Recruiting Site                                                                            |
| Stephanie                                         | Gouny             |                              |                  | University Hospitals Birmingham NH   | Birmingham, UK                           | Research Nurse                                          | Recruiting Site                                                                            |
| Hazel                                             | Smith             |                              |                  | University Hospitals Birmingham NH   | Birmingham, UK                           |                                                         | Recruiting Site                                                                            |
| Tracy                                             | Mason             |                              |                  | University Hospitals Birmingham NH   | Birmingham, UK                           | Research Nurse                                          | Recruiting Site                                                                            |
| Natalie                                           | Dooley            |                              |                  | University Hospitals Birmingham NH   | Birmingham, UK                           | Research Nurse                                          | Recruiting Site                                                                            |
| Amy                                               | Clark             |                              |                  | University Hospitals Birmingham NH   | Birmingham, UK                           | Research nurse                                          | Recruiting Site                                                                            |
| Joyce                                             | Yeung             |                              | MD               | Heartlands Hospital,Heart of England | Birmingham, UK                           | Principal Investigator                                  | Recruiting Site                                                                            |
| Jo                                                | Gresty            |                              |                  | Heartlands Hospital,Heart of England | Birmingham, UK                           | Research Nurse                                          | Recruiting Site                                                                            |

## Supplemental Online Content: Nonauthor Collaborators

\*First name, last name, and suffix (if applicable) are required and will appear in PubMed.

| *First Name and Middle Initial(s) | *Last Name                  | *Suffix (eg, Jr, III) | Academic Degrees | Institution                             | Location (city, state/province, country) | Role or Contribution, eg, chair, principal investigator | Group (if more than 1 Group listed in the byline) and/or Subgroup (eg, Steering Committee) |
|-----------------------------------|-----------------------------|-----------------------|------------------|-----------------------------------------|------------------------------------------|---------------------------------------------------------|--------------------------------------------------------------------------------------------|
| Teresa                            | Melody                      |                       |                  | Heartlands Hospital,Heart of England    | Birmingham, UK                           | Research Manager                                        | Recruiting Site                                                                            |
| Ellie                             | Reeves                      |                       |                  | Heartlands Hospital,Heart of England    | Birmingham, UK                           | Research Nurse                                          | Recruiting Site                                                                            |
| Rachel                            | Smith                       |                       |                  | Heartlands Hospital,Heart of England    | Birmingham, UK                           | Research Assistant                                      | Recruiting Site                                                                            |
| Julia                             | Sampson                     |                       |                  | Heartlands Hospital,Heart of England    | Birmingham, UK                           | Research Nurse                                          | Recruiting Site                                                                            |
| ACCP                              | Team BHH Critical Care Unit |                       |                  | Heartlands Hospital,Heart of England    | Birmingham, UK                           |                                                         | Recruiting Site                                                                            |
| Chris                             | Nutt                        |                       | MD               | Royal Victoria Hospital, Belfast Health | Belfast, UK                              | Principal Investigator                                  | Recruiting Site                                                                            |
| James                             | Mcnamee                     |                       | MD               | Royal Victoria Hospital, Belfast Health | Belfast, UK                              | Sub-Investigator                                        | Recruiting Site                                                                            |
| Danny                             | Mcauley                     |                       | MD               | Royal Victoria Hospital, Belfast Health | Belfast, UK                              | Sub-Investigator                                        | Recruiting Site                                                                            |
| Anen                              | Boyle                       |                       |                  | Royal Victoria Hospital, Belfast Health | Belfast, UK                              |                                                         | Recruiting Site                                                                            |
| Loren                             | McGinley                    |                       |                  | Royal Victoria Hospital, Belfast Health | Belfast, UK                              |                                                         | Recruiting Site                                                                            |
| Chris                             | Wright                      |                       |                  | Royal Victoria Hospital, Belfast Health | Belfast, UK                              |                                                         | Recruiting Site                                                                            |
| Kathryn                           | Ward                        |                       |                  | Royal Victoria Hospital, Belfast Health | Belfast, UK                              |                                                         | Recruiting Site                                                                            |
| Lauren                            | Macartney                   |                       |                  | Royal Victoria Hospital, Belfast Health | Belfast, UK                              |                                                         | Recruiting Site                                                                            |
| Justine                           | Mccann                      |                       |                  | Royal Victoria Hospital, Belfast Health | Belfast, UK                              |                                                         | Recruiting Site                                                                            |
| Brian                             | Wells                       |                       |                  | Royal Victoria Hospital, Belfast Health | Belfast, UK                              |                                                         | Recruiting Site                                                                            |
| Janette                           | Mills                       |                       |                  | Royal Victoria Hospital, Belfast Health | Belfast, UK                              |                                                         | Recruiting Site                                                                            |
| Leona                             | Bannon                      |                       |                  | Royal Victoria Hospital, Belfast Health | Belfast, UK                              |                                                         | Recruiting Site                                                                            |
| Aisling                           | O'Neill                     |                       |                  | Royal Victoria Hospital, Belfast Health | Belfast, UK                              |                                                         | Recruiting Site                                                                            |
| Stephanie                         | Finn                        |                       |                  | Royal Victoria Hospital, Belfast Health | Belfast, UK                              |                                                         | Recruiting Site                                                                            |
| Anthony                           | Gordon                      |                       | MD               | Imperial College Healthcare NHS Tru     | London, UK                               | Principal Investigator                                  | Recruiting Site                                                                            |
| David                             | Antcliffe                   |                       | MD               | Imperial College Healthcare NHS Tru     | London, UK                               | Sub-Investigator                                        | Recruiting Site                                                                            |
| Stephen                           | Brett                       |                       | MD               | Imperial College Healthcare NHS Tru     | London, UK                               | Sub-Investigator                                        | Recruiting Site                                                                            |
| Dorota                            | Banach                      |                       |                  | Imperial College Healthcare NHS Tru     | London, UK                               | Research Nurse                                          | Recruiting Site                                                                            |
| Leilani                           | Cabreros                    |                       |                  | Imperial College Healthcare NHS Tru     | London, UK                               | Research Nurse                                          | Recruiting Site                                                                            |
| Laura                             | Curran                      |                       |                  | Imperial College Healthcare NHS Tru     | London, UK                               | Research Nurse                                          | Recruiting Site                                                                            |
| Sonia                             | Sousa Arias                 |                       |                  | Imperial College Healthcare NHS Tru     | London, UK                               | Research Nurse                                          | Recruiting Site                                                                            |
| Roceld                            | Rojo                        |                       |                  | Imperial College Healthcare NHS Tru     | London, UK                               | Research Nurse                                          | Recruiting Site                                                                            |
| Ziortza                           | Fernandez de Pinedo Artaraz |                       |                  | Imperial College Healthcare NHS Tru     | London, UK                               | Research Nurse                                          | Recruiting Site                                                                            |
| Phoebe                            | Coghlan                     |                       |                  | Imperial College Healthcare NHS Tru     | London, UK                               | Research Nurse                                          | Recruiting Site                                                                            |
| Maie                              | Templeton                   |                       |                  | Imperial College Healthcare NHS Tru     | London, UK                               | Research Manager                                        | Recruiting Site                                                                            |
| Ahmed                             | ElHaddad                    |                       | MD               | Imperial College Healthcare NHS Tru     | London, UK                               | Sub-Investigator                                        | Recruiting Site                                                                            |
| Zohonon                           | Sabine Loko                 |                       |                  | Imperial College Healthcare NHS Tru     | London, UK                               |                                                         | Recruiting Site                                                                            |
| Gareth                            | Barker                      |                       |                  | Imperial College Healthcare NHS Tru     | London, UK                               |                                                         | Recruiting Site                                                                            |
| Niall                             | MacCallum                   |                       | MD               | University College London Hospitals     | London, UK                               | Principal Investigator                                  | Recruiting Site                                                                            |

## Supplemental Online Content: Nonauthor Collaborators

\*First name, last name, and suffix (if applicable) are required and will appear in PubMed.

| *First Name and Middle Initial(s) | *Last Name   | *Suffix (eg, Jr, III) | Academic Degrees | Institution                         | Location (city, state/province, country) | Role or Contribution, eg, chair, principal investigator | Group (if more than 1 Group listed in the byline) and/or Subgroup (eg, Steering Committee) |
|-----------------------------------|--------------|-----------------------|------------------|-------------------------------------|------------------------------------------|---------------------------------------------------------|--------------------------------------------------------------------------------------------|
| David                             | Brealey      |                       | MD               | University College London Hospitals | London, UK                               | Sub-Investigator                                        | Recruiting Site                                                                            |
| Mervyn                            | Singer       |                       | MD               | University College London Hospitals | London, UK                               | Sub-Investigator                                        | Recruiting Site                                                                            |
| Kristian                          | Warnes       |                       |                  | University College London Hospitals | London, UK                               |                                                         | Recruiting Site                                                                            |
| Nina                              | Bason        |                       |                  | University College London Hospitals | London, UK                               |                                                         | Recruiting Site                                                                            |
| Dorota                            | Filipowicz   |                       |                  | University College London Hospitals | London, UK                               |                                                         | Recruiting Site                                                                            |
| Georgia                           | Bercades     |                       |                  | University College London Hospitals | London, UK                               |                                                         | Recruiting Site                                                                            |
| Ingrid                            | Hass         |                       |                  | University College London Hospitals | London, UK                               |                                                         | Recruiting Site                                                                            |
| Jung                              | Ryu          |                       |                  | University College London Hospitals | London, UK                               |                                                         | Recruiting Site                                                                            |
| Deborah                           | Smyth        |                       |                  | University College London Hospitals | London, UK                               |                                                         | Recruiting Site                                                                            |
| Dorothy                           | Ilano        |                       |                  | University College London Hospitals | London, UK                               |                                                         | Recruiting Site                                                                            |
| Dan                               | Harvey       |                       | MD               | Nottingham University Hospitals NHS | Nottingham, UK                           | Principal Investigator                                  | Recruiting Site                                                                            |
| Louise                            | Conner       |                       |                  | Nottingham University Hospitals NHS | Nottingham, UK                           |                                                         | Recruiting Site                                                                            |
| Lucy                              | Ryan         |                       |                  | Nottingham University Hospitals NHS | Nottingham, UK                           | Research Nurse                                          | Recruiting Site                                                                            |
| Cecilia                           | Peters       |                       |                  | Nottingham University Hospitals NHS | Nottingham, UK                           | Research nurse                                          | Recruiting Site                                                                            |
| Megan                             | Meredith     |                       |                  | Nottingham University Hospitals NHS | Nottingham, UK                           | Research Nurse                                          | Recruiting Site                                                                            |
| Megan                             | Mcaulay      |                       |                  | Nottingham University Hospitals NHS | Nottingham, UK                           |                                                         | Recruiting Site                                                                            |
| Zoe                               | Whitman      |                       |                  | Nottingham University Hospitals NHS | Nottingham, UK                           |                                                         | Recruiting Site                                                                            |
| Amy                               | Clark        |                       |                  | Nottingham University Hospitals NHS | Nottingham, UK                           |                                                         | Recruiting Site                                                                            |
| Lucy                              | Morris       |                       |                  | Nottingham University Hospitals NHS | Nottingham, UK                           | Research Nurse                                          | Recruiting Site                                                                            |
| Julia                             | Sampson      |                       |                  | Nottingham University Hospitals NHS | Nottingham, UK                           | Research Nurse                                          | Recruiting Site                                                                            |
| Claudia                           | Woodford     |                       |                  | Nottingham University Hospitals NHS | Nottingham, UK                           | Research Nurse                                          | Recruiting Site                                                                            |
| Sally                             | Hodgkinson   |                       |                  | Nottingham University Hospitals NHS | Nottingham, UK                           |                                                         | Recruiting Site                                                                            |
| Sonya                             | Finucane     |                       |                  | Nottingham University Hospitals NHS | Nottingham, UK                           | Research Nurse                                          | Recruiting Site                                                                            |
| Luigi                             | Camporota    |                       | MD               | Guy's and St Thomas' NHS Foundatio  | London, UK                               | Principal Investigator                                  | Recruiting Site                                                                            |
| Manu                              | Shankar-Hari |                       | MD               | Guy's and St Thomas' NHS Foundatio  | London, UK                               | Sub-Investigator                                        | Recruiting Site                                                                            |
| Marlies                           | Ostermann    |                       | MD               | Guy's and St Thomas' NHS Foundatio  | London, UK                               | Sub-Investigator                                        | Recruiting Site                                                                            |
| Aneta                             | Bociek       |                       |                  | Guy's and St Thomas' NHS Foundatio  | London, UK                               |                                                         | Recruiting Site                                                                            |
| Rosario                           | Lim          |                       |                  | Guy's and St Thomas' NHS Foundatio  | London, UK                               |                                                         | Recruiting Site                                                                            |
| Neus                              | GrauNovellas |                       |                  | Guy's and St Thomas' NHS Foundatio  | London, UK                               |                                                         | Recruiting Site                                                                            |
| Natalie                           | Palmer       |                       |                  | Guy's and St Thomas' NHS Foundatio  | London, UK                               |                                                         | Recruiting Site                                                                            |
| Angela                            | Cape         |                       |                  | Guy's and St Thomas' NHS Foundatio  | London, UK                               |                                                         | Recruiting Site                                                                            |
| Anea                              | Kelly        |                       |                  | Guy's and St Thomas' NHS Foundatio  | London, UK                               |                                                         | Recruiting Site                                                                            |
| Gill                              | Arbane       |                       |                  | Guy's and St Thomas' NHS Foundatio  | London, UK                               |                                                         | Recruiting Site                                                                            |
| Sarah                             | Campos       |                       |                  | Guy's and St Thomas' NHS Foundatio  | London, UK                               |                                                         | Recruiting Site                                                                            |

## Supplemental Online Content: Nonauthor Collaborators

\*First name, last name, and suffix (if applicable) are required and will appear in PubMed.

| *First Name and Middle Initial(s) | *Last Name | *Suffix (eg, Jr, III) | Academic Degrees | Institution                           | Location (city, state/province, country) | Role or Contribution, eg, chair, principal investigator | Group (if more than 1 Group listed in the byline) and/or Subgroup (eg, Steering Committee) |
|-----------------------------------|------------|-----------------------|------------------|---------------------------------------|------------------------------------------|---------------------------------------------------------|--------------------------------------------------------------------------------------------|
| Michael                           | Singh      |                       |                  | Guy's and St Thomas' NHS Foundatio    | London, UK                               |                                                         | Recruiting Site                                                                            |
| Jinny                             | Yoo        |                       |                  | Guy's and St Thomas' NHS Foundatio    | London, UK                               |                                                         | Recruiting Site                                                                            |
| Richard                           | Innes      |                       | MD               | Musgrove Park Hospital Taunton and    | Taunton, UK                              | Principal Investigator                                  | Recruiting Site                                                                            |
| Fiona                             | Dempsey    |                       | MD               | Musgrove Park Hospital Taunton and    | Taunton, UK                              | Co-Principal Investigator                               | Recruiting Site                                                                            |
| Patricia                          | Doble      |                       |                  | Musgrove Park Hospital Taunton and    | Taunton, UK                              |                                                         | Recruiting Site                                                                            |
| Rebecca                           | Purnell    |                       |                  | Musgrove Park Hospital Taunton and    | Taunton, UK                              |                                                         | Recruiting Site                                                                            |
| Moira                             | Tait       |                       |                  | Musgrove Park Hospital Taunton and    | Taunton, UK                              |                                                         | Recruiting Site                                                                            |
| Jo                                | Hutter     |                       |                  | Musgrove Park Hospital Taunton and    | Taunton, UK                              |                                                         | Recruiting Site                                                                            |
| Corinne                           | Pawley     |                       |                  | Musgrove Park Hospital Taunton and    | Taunton, UK                              |                                                         | Recruiting Site                                                                            |
| Joy                               | Rowe       |                       |                  | Musgrove Park Hospital Taunton and    | Taunton, UK                              |                                                         | Recruiting Site                                                                            |
| Catherine                         | Wane       |                       |                  | Musgrove Park Hospital Taunton and    | Taunton, UK                              |                                                         | Recruiting Site                                                                            |
| Richard                           | Burgess    |                       |                  | Musgrove Park Hospital Taunton and    | Taunton, UK                              |                                                         | Recruiting Site                                                                            |
| Ashly                             | Thomas     |                       |                  | Musgrove Park Hospital Taunton and    | Taunton, UK                              |                                                         | Recruiting Site                                                                            |
| Pulak                             | Paul       |                       | MD               | King's Mill Hospital Sherwood Forest  | Mansfield, UK                            | Principal Investigator                                  | Recruiting Site                                                                            |
| Brenda                            | White      |                       |                  | King's Mill Hospital Sherwood Forest  | Mansfield, UK                            |                                                         | Recruiting Site                                                                            |
| Wayne                             | Lovegrove  |                       |                  | King's Mill Hospital Sherwood Forest  | Mansfield, UK                            |                                                         | Recruiting Site                                                                            |
| Mandy                             | Gill       |                       |                  | King's Mill Hospital Sherwood Forest  | Mansfield, UK                            |                                                         | Recruiting Site                                                                            |
| Lynne                             | Wade       |                       |                  | King's Mill Hospital Sherwood Forest  | Mansfield, UK                            |                                                         | Recruiting Site                                                                            |
| Tracy                             | Brear      |                       |                  | King's Mill Hospital Sherwood Forest  | Mansfield, UK                            |                                                         | Recruiting Site                                                                            |
| Vishal                            | Dhokia     |                       |                  | King's Mill Hospital Sherwood Forest  | Mansfield, UK                            |                                                         | Recruiting Site                                                                            |
| Debbie                            | Jackson    |                       |                  | King's Mill Hospital Sherwood Forest  | Mansfield, UK                            |                                                         | Recruiting Site                                                                            |
| Sarah                             | Shelton    |                       |                  | King's Mill Hospital Sherwood Forest  | Mansfield, UK                            |                                                         | Recruiting Site                                                                            |
| Jill                              | Kirk       |                       |                  | King's Mill Hospital Sherwood Forest  | Mansfield, UK                            |                                                         | Recruiting Site                                                                            |
| Anew                              | Boulton    |                       |                  | King's Mill Hospital Sherwood Forest  | Mansfield, UK                            |                                                         | Recruiting Site                                                                            |
| Alistair                          | Roy        |                       | MD               | Sunderland Royal Hospital City Hosp   | Sunderland, UK                           | Principal Investigator                                  | Recruiting Site                                                                            |
| Anthony                           | Rostron    |                       | MD               | Sunderland Royal Hospital City Hosp   | Sunderland, UK                           |                                                         | Recruiting Site                                                                            |
| Zeynep                            | Elcioglu   |                       | MD               | Sunderland Royal Hospital City Hosp   | Sunderland, UK                           | Associate Principal Investigator                        | Recruiting Site                                                                            |
| Lindsey                           | Woods      |                       |                  | Sunderland Royal Hospital City Hosp   | Sunderland, UK                           |                                                         | Recruiting Site                                                                            |
| Sarah                             | Cornell    |                       |                  | Sunderland Royal Hospital City Hosp   | Sunderland, UK                           |                                                         | Recruiting Site                                                                            |
| Rebecca                           | Betts      |                       |                  | Sunderland Royal Hospital City Hosp   | Sunderland, UK                           |                                                         | Recruiting Site                                                                            |
| Jill                              | Holden     |                       |                  | Sunderland Royal Hospital City Hosp   | Sunderland, UK                           |                                                         | Recruiting Site                                                                            |
| Stephen                           | Laybourne  |                       |                  | Sunderland Royal Hospital City Hosp   | Sunderland, UK                           |                                                         | Recruiting Site                                                                            |
| Kimberley                         | Rogerson   |                       |                  | Sunderland Royal Hospital City Hosp   | Sunderland, UK                           |                                                         | Recruiting Site                                                                            |
| Jeremy                            | Bewley     |                       | MD               | Bristol Royal Infirmary University Ho | Bristol, UK                              | Principal Investigator                                  | Recruiting Site                                                                            |

## Supplemental Online Content: Nonauthor Collaborators

\*First name, last name, and suffix (if applicable) are required and will appear in PubMed.

| *First Name and Middle Initial(s) | *Last Name    | *Suffix (eg, Jr, III) | Academic Degrees | Institution                           | Location (city, state/province, country) | Role or Contribution, eg, chair, principal investigator | Group (if more than 1 Group listed in the byline) and/or Subgroup (eg, Steering Committee) |
|-----------------------------------|---------------|-----------------------|------------------|---------------------------------------|------------------------------------------|---------------------------------------------------------|--------------------------------------------------------------------------------------------|
| Rebekah                           | Johnson       |                       |                  | Bristol Royal Infirmary University Ho | Bristol, UK                              |                                                         | Recruiting Site                                                                            |
| Anna                              | Chillingworth |                       |                  | Bristol Royal Infirmary University Ho | Bristol, UK                              |                                                         | Recruiting Site                                                                            |
| Bethany                           | Gumbrill      |                       |                  | Bristol Royal Infirmary University Ho | Bristol, UK                              |                                                         | Recruiting Site                                                                            |
| Hilary                            | Galvin        |                       |                  | Bristol Royal Infirmary University Ho | Bristol, UK                              |                                                         | Recruiting Site                                                                            |
| Kim                               | Wright        |                       |                  | Bristol Royal Infirmary University Ho | Bristol, UK                              |                                                         | Recruiting Site                                                                            |
| Georgia                           | Efford        |                       |                  | Bristol Royal Infirmary University Ho | Bristol, UK                              |                                                         | Recruiting Site                                                                            |
| Kathleen                          | Corcoran      |                       |                  | Bristol Royal Infirmary University Ho | Bristol, UK                              |                                                         | Recruiting Site                                                                            |
| Libby                             | Cole          |                       |                  | Bristol Royal Infirmary University Ho | Bristol, UK                              |                                                         | Recruiting Site                                                                            |
| Katie                             | Sweet         |                       |                  | Bristol Royal Infirmary University Ho | Bristol, UK                              |                                                         | Recruiting Site                                                                            |
| Denise                            | Webster       |                       |                  | Bristol Royal Infirmary University Ho | Bristol, UK                              |                                                         | Recruiting Site                                                                            |
| Lisa                              | Grimmer       |                       |                  | Bristol Royal Infirmary University Ho | Bristol, UK                              |                                                         | Recruiting Site                                                                            |
| Gemma                             | Paris         |                       |                  | Bristol Royal Infirmary University Ho | Bristol, UK                              |                                                         | Recruiting Site                                                                            |
| Chloe                             | Searles       |                       |                  | Bristol Royal Infirmary University Ho | Bristol, UK                              |                                                         | Recruiting Site                                                                            |
| Zoe                               | Garland       |                       |                  | Bristol Royal Infirmary University Ho | Bristol, UK                              |                                                         | Recruiting Site                                                                            |
| Charly                            | Gibson        |                       |                  | Royal Devon and Exeter NHS Founda     | Exeter, UK                               | Principal Investigator                                  | Recruiting Site                                                                            |
| Melanie                           | Hutchings     |                       |                  | Royal Devon and Exeter NHS Founda     | Exeter, UK                               |                                                         | Recruiting Site                                                                            |
| Fiona                             | Walters       |                       |                  | Royal Devon and Exeter NHS Founda     | Exeter, UK                               |                                                         | Recruiting Site                                                                            |
| Sinead                            | Kelly         |                       |                  | Royal Devon and Exeter NHS Founda     | Exeter, UK                               |                                                         | Recruiting Site                                                                            |
| Lorraine                          | Scaife        |                       |                  | Royal Devon and Exeter NHS Founda     | Exeter, UK                               |                                                         | Recruiting Site                                                                            |
| Kelly                             | Littlewood    |                       |                  | Royal Devon and Exeter NHS Founda     | Exeter, UK                               |                                                         | Recruiting Site                                                                            |
| James                             | Leavy         |                       |                  | Royal Devon and Exeter NHS Founda     | Exeter, UK                               |                                                         | Recruiting Site                                                                            |
| Shirley                           | Todd          |                       |                  | Royal Devon and Exeter NHS Founda     | Exeter, UK                               |                                                         | Recruiting Site                                                                            |
| Elizabeth                         | Gordon        |                       |                  | Royal Devon and Exeter NHS Founda     | Exeter, UK                               |                                                         | Recruiting Site                                                                            |
| Sadie                             | Heddon        |                       |                  | Royal Devon and Exeter NHS Founda     | Exeter, UK                               |                                                         | Recruiting Site                                                                            |
| Victor                            | Mariano       |                       |                  | Royal Devon and Exeter NHS Founda     | Exeter, UK                               |                                                         | Recruiting Site                                                                            |
| Karin                             | Gupwell       |                       |                  | Royal Devon and Exeter NHS Founda     | Exeter, UK                               |                                                         | Recruiting Site                                                                            |
| Rebecca                           | Appelboom     |                       |                  | Royal Devon and Exeter NHS Founda     | Exeter, UK                               |                                                         | Recruiting Site                                                                            |
| Samantha                          | Keenan        |                       |                  | Royal Devon and Exeter NHS Founda     | Exeter, UK                               |                                                         | Recruiting Site                                                                            |
| Cassie                            | Brady         |                       |                  | Royal Devon and Exeter NHS Founda     | Exeter, UK                               |                                                         | Recruiting Site                                                                            |
| Ian                               | Mew           |                       | MD               | Dorset County Hospital NHS Founda     | Dorchester, UK                           | Principal Investigator                                  | Recruiting Site                                                                            |
| Duncan                            | Chambler      |                       | MD               | Dorset County Hospital NHS Founda     | Dorchester, UK                           | Sub-Investigator                                        | Recruiting Site                                                                            |
| Sarah                             | Williams      |                       |                  | Dorset County Hospital NHS Founda     | Dorchester, UK                           |                                                         | Recruiting Site                                                                            |
| Pauline                           | Ashcroft      |                       |                  | Dorset County Hospital NHS Founda     | Dorchester, UK                           |                                                         | Recruiting Site                                                                            |
| Patricia                          | Williams      |                       |                  | Dorset County Hospital NHS Founda     | Dorchester, UK                           |                                                         | Recruiting Site                                                                            |

## Supplemental Online Content: Nonauthor Collaborators

\*First name, last name, and suffix (if applicable) are required and will appear in PubMed.

| *First Name and Middle Initial(s) | *Last Name  | *Suffix (eg, Jr, III) | Academic Degrees | Institution                         | Location (city, state/province, country) | Role or Contribution, eg, chair, principal investigator | Group (if more than 1 Group listed in the byline) and/or Subgroup (eg, Steering Committee) |
|-----------------------------------|-------------|-----------------------|------------------|-------------------------------------|------------------------------------------|---------------------------------------------------------|--------------------------------------------------------------------------------------------|
| James                             | Rees        |                       |                  | Dorset County Hospital NHS Foundat  | Dorchester, UK                           |                                                         | Recruiting Site                                                                            |
| Sophie                            | Wiseman     |                       |                  | Dorset County Hospital NHS Foundat  | Dorchester, UK                           |                                                         | Recruiting Site                                                                            |
| Sarah                             | Horton      |                       |                  | Dorset County Hospital NHS Foundat  | Dorchester, UK                           |                                                         | Recruiting Site                                                                            |
| Mark                              | Shortland   |                       |                  | Dorset County Hospital NHS Foundat  | Dorchester, UK                           |                                                         | Recruiting Site                                                                            |
| Stephanie                         | Dukes       |                       |                  | Dorset County Hospital NHS Foundat  | Dorchester, UK                           |                                                         | Recruiting Site                                                                            |
| Andy                              | Ball        |                       |                  | Dorset County Hospital NHS Foundat  | Dorchester, UK                           |                                                         | Recruiting Site                                                                            |
| Michael                           | Spivey      |                       | MD               | Royal Cornwall Hospitals NHS Trust  | Truro, UK                                | Principal Investigator                                  | Recruiting Site                                                                            |
| Jennie                            | Stephens    |                       | MD               | Royal Cornwall Hospitals NHS Trust  | Truro, UK                                | Co-Principal Investigator                               | Recruiting Site                                                                            |
| Sarah                             | Bean        |                       |                  | Royal Cornwall Hospitals NHS Trust  | Truro, UK                                | Research Nurse                                          | Recruiting Site                                                                            |
| Karen                             | Burt        |                       |                  | Royal Cornwall Hospitals NHS Trust  | Truro, UK                                | Research Nurse                                          | Recruiting Site                                                                            |
| Rachel                            | Chapman     |                       |                  | Royal Cornwall Hospitals NHS Trust  | Truro, UK                                | Research Nurse                                          | Recruiting Site                                                                            |
| Carol                             | Richards    |                       |                  | Royal Cornwall Hospitals NHS Trust  | Truro, UK                                | Pharmacist                                              | Recruiting Site                                                                            |
| Lorraine                          | Moore       |                       |                  | Royal Cornwall Hospitals NHS Trust  | Truro, UK                                | Pharmacist                                              | Recruiting Site                                                                            |
| Linda                             | Allsop      |                       |                  | Royal Cornwall Hospitals NHS Trust  | Truro, UK                                |                                                         | Recruiting Site                                                                            |
| Amber                             | Wynn        |                       |                  | Royal Cornwall Hospitals NHS Trust  | Truro, UK                                |                                                         | Recruiting Site                                                                            |
| Louise                            | Latty       |                       |                  | Royal Cornwall Hospitals NHS Trust  | Truro, UK                                |                                                         | Recruiting Site                                                                            |
| Sam                               | Waddy       |                       | MD               | University Hospitals Plymouth NHS T | Plymouth, UK                             | Principal Investigator                                  | Recruiting Site                                                                            |
| Kayleigh                          | Spencer     |                       |                  | University Hospitals Plymouth NHS T | Plymouth, UK                             |                                                         | Recruiting Site                                                                            |
| Bethan                            | Stowe       |                       |                  | University Hospitals Plymouth NHS T | Plymouth, UK                             |                                                         | Recruiting Site                                                                            |
| Georgina                          | Cox         |                       |                  | University Hospitals Plymouth NHS T | Plymouth, UK                             |                                                         | Recruiting Site                                                                            |
| Helen                             | McMillan    |                       |                  | University Hospitals Plymouth NHS T | Plymouth, UK                             |                                                         | Recruiting Site                                                                            |
| Liana                             | Lankester   |                       |                  | University Hospitals Plymouth NHS T | Plymouth, UK                             |                                                         | Recruiting Site                                                                            |
| Colin                             | Wells       |                       |                  | University Hospitals Plymouth NHS T | Plymouth, UK                             |                                                         | Recruiting Site                                                                            |
| Rosalyn                           | Squire      |                       |                  | University Hospitals Plymouth NHS T | Plymouth, UK                             |                                                         | Recruiting Site                                                                            |
| Mike                              | Marner      |                       |                  | University Hospitals Plymouth NHS T | Plymouth, UK                             |                                                         | Recruiting Site                                                                            |
| Robert                            | Jackson     |                       |                  | University Hospitals Plymouth NHS T | Plymouth, UK                             |                                                         | Recruiting Site                                                                            |
| Nikitas                           | Nikitas     |                       |                  | University Hospitals Plymouth NHS T | Plymouth, UK                             |                                                         | Recruiting Site                                                                            |
| Stuart                            | Dickson     |                       |                  | University Hospitals Plymouth NHS T | Plymouth, UK                             |                                                         | Recruiting Site                                                                            |
| Henrik                            | Reschreiter |                       | MD               | Poole Hospital NHS Foundation Trus  | Poole, UK                                | Principal Investigator                                  | Recruiting Site                                                                            |
| James                             | Bromilow    |                       |                  | Poole Hospital NHS Foundation Trus  | Poole, UK                                |                                                         | Recruiting Site                                                                            |
| James                             | Keegan      |                       |                  | Poole Hospital NHS Foundation Trus  | Poole, UK                                |                                                         | Recruiting Site                                                                            |
| Chris                             | Loew        |                       |                  | Poole Hospital NHS Foundation Trus  | Poole, UK                                |                                                         | Recruiting Site                                                                            |
| Ken                               | Power       |                       |                  | Poole Hospital NHS Foundation Trus  | Poole, UK                                |                                                         | Recruiting Site                                                                            |
| Spike                             | Briggs      |                       |                  | Poole Hospital NHS Foundation Trus  | Poole, UK                                |                                                         | Recruiting Site                                                                            |

## Supplemental Online Content: Nonauthor Collaborators

\*First name, last name, and suffix (if applicable) are required and will appear in PubMed.

| *First Name and Middle Initial(s) | *Last Name       | *Suffix (eg, Jr, III) | Academic Degrees | Institution                         | Location (city, state/province, country) | Role or Contribution, eg, chair, principal investigator | Group (if more than 1 Group listed in the byline) and/or Subgroup (eg, Steering Committee) |
|-----------------------------------|------------------|-----------------------|------------------|-------------------------------------|------------------------------------------|---------------------------------------------------------|--------------------------------------------------------------------------------------------|
| Julie                             | Camsooksai       |                       |                  | Poole Hospital NHS Foundation Trust | Poole, UK                                |                                                         | Recruiting Site                                                                            |
| Sarah                             | Patch            |                       |                  | Poole Hospital NHS Foundation Trust | Poole, UK                                |                                                         | Recruiting Site                                                                            |
| Sarah                             | Jenkins          |                       |                  | Poole Hospital NHS Foundation Trust | Poole, UK                                |                                                         | Recruiting Site                                                                            |
| Sharon                            | Power            |                       |                  | Poole Hospital NHS Foundation Trust | Poole, UK                                |                                                         | Recruiting Site                                                                            |
| Elizabeth                         | Woodward         |                       |                  | Poole Hospital NHS Foundation Trust | Poole, UK                                |                                                         | Recruiting Site                                                                            |
| David                             | Pogson           |                       | MD               | Queen Alexandra Hospital Portsmouth | Portsmouth, UK                           | Principal Investigator                                  | Recruiting Site                                                                            |
| Zoe                               | Daly             |                       |                  | Queen Alexandra Hospital Portsmouth | Portsmouth, UK                           | Research Nurse                                          | Recruiting Site                                                                            |
| Steve                             | Rose             |                       |                  | Queen Alexandra Hospital Portsmouth | Portsmouth, UK                           | Research Nurse                                          | Recruiting Site                                                                            |
| Aimi                              | Collins          |                       |                  | Queen Alexandra Hospital Portsmouth | Portsmouth, UK                           | Research Nurse                                          | Recruiting Site                                                                            |
| Amy                               | Phelps           |                       |                  | Queen Alexandra Hospital Portsmouth | Portsmouth, UK                           | Research Nurse                                          | Recruiting Site                                                                            |
| Helen                             | Claridge         |                       |                  | Queen Alexandra Hospital Portsmouth | Portsmouth, UK                           |                                                         | Recruiting Site                                                                            |
| Christine                         | Minnis           |                       |                  | Queen Alexandra Hospital Portsmouth | Portsmouth, UK                           |                                                         | Recruiting Site                                                                            |
| Sarah                             | Inglis           |                       |                  | Queen Alexandra Hospital Portsmouth | Portsmouth, UK                           |                                                         | Recruiting Site                                                                            |
| Lutece                            | Brimfield        |                       |                  | Queen Alexandra Hospital Portsmouth | Portsmouth, UK                           |                                                         | Recruiting Site                                                                            |
| Charlotte                         | Wong             |                       |                  | Queen Alexandra Hospital Portsmouth | Portsmouth, UK                           |                                                         | Recruiting Site                                                                            |
| Ingeborg                          | Welters          |                       | MD               | Royal Liverpool University Hospital | Liverpool, UK                            | Principal Investigator                                  | Recruiting Site                                                                            |
| Karen                             | Williams         |                       |                  | Royal Liverpool University Hospital | Liverpool, UK                            | Research Nurse                                          | Recruiting Site                                                                            |
| Victoria                          | Waugh            |                       |                  | Royal Liverpool University Hospital | Liverpool, UK                            | Research Nurse                                          | Recruiting Site                                                                            |
| Julie                             | Patrick-Heselton |                       |                  | Royal Liverpool University Hospital | Liverpool, UK                            | Research Nurse                                          | Recruiting Site                                                                            |
| Emily                             | Johnson          |                       |                  | Royal Liverpool University Hospital | Liverpool, UK                            | Research Nurse                                          | Recruiting Site                                                                            |
| David                             | Shaw             |                       |                  | Royal Liverpool University Hospital | Liverpool, UK                            | Research Nurse                                          | Recruiting Site                                                                            |
| Brian                             | Johnston         |                       |                  | Royal Liverpool University Hospital | Liverpool, UK                            | Clinical Research Fellow                                | Recruiting Site                                                                            |
| Maryam                            | Crews            |                       | MD               | Royal Liverpool University Hospital | Liverpool, UK                            | Co-Principal Investigator                               | Recruiting Site                                                                            |
| Alicia                            | Waite            |                       |                  | Royal Liverpool University Hospital | Liverpool, UK                            | Clinical Research Fellow                                | Recruiting Site                                                                            |
| Vinoth                            | Sankar           |                       | MD               | Royal Liverpool University Hospital | Liverpool, UK                            | Co-Principal Investigator                               | Recruiting Site                                                                            |
| Jonathan                          | Walker           |                       | MD               | Royal Liverpool University Hospital | Liverpool, UK                            | Co-Principal Investigator                               | Recruiting Site                                                                            |
| Peter                             | Turton           |                       |                  | Royal Liverpool University Hospital | Liverpool, UK                            | Clinical Research Fellow                                | Recruiting Site                                                                            |
| Richard                           | Wenstone         |                       | MD               | Royal Liverpool University Hospital | Liverpool, UK                            | Co-Principal Investigator                               | Recruiting Site                                                                            |
| Jaime                             | Fernandez Roman  |                       |                  | Royal Liverpool University Hospital | Liverpool, UK                            | Research Nurse                                          | Recruiting Site                                                                            |
| Alison                            | Hall             |                       | MD               | Royal Liverpool University Hospital | Liverpool, UK                            | Co-Principal Investigator                               | Recruiting Site                                                                            |
| Maria                             | Lopez Martinez   |                       |                  | Royal Liverpool University Hospital | Liverpool, UK                            | Research Nurse                                          | Recruiting Site                                                                            |
| David                             | Oliver Hamilton  |                       |                  | Royal Liverpool University Hospital | Liverpool, UK                            | Clinical Research Fellow                                | Recruiting Site                                                                            |
| David                             | Coey             |                       |                  | Royal Liverpool University Hospital | Liverpool, UK                            |                                                         | Recruiting Site                                                                            |
| Philip                            | Shelley          |                       |                  | Royal Liverpool University Hospital | Liverpool, UK                            |                                                         | Recruiting Site                                                                            |

## Supplemental Online Content: Nonauthor Collaborators

\*First name, last name, and suffix (if applicable) are required and will appear in PubMed.

| *First Name and Middle Initial(s) | *Last Name      | *Suffix (eg, Jr, III) | Academic Degrees | Institution                         | Location (city, state/province, country) | Role or Contribution, eg, chair, principal investigator | Group (if more than 1 Group listed in the byline) and/or Subgroup (eg, Steering Committee) |
|-----------------------------------|-----------------|-----------------------|------------------|-------------------------------------|------------------------------------------|---------------------------------------------------------|--------------------------------------------------------------------------------------------|
| Martin                            | Goulding        |                       |                  | Royal Liverpool University Hospital | Liverpool, UK                            |                                                         | Recruiting Site                                                                            |
| Karen                             | Kavanagh        |                       |                  | Royal Liverpool University Hospital | Liverpool, UK                            |                                                         | Recruiting Site                                                                            |
| Ann                               | Marron          |                       |                  | Royal Liverpool University Hospital | Liverpool, UK                            |                                                         | Recruiting Site                                                                            |
| Hannah                            | Allsop          |                       |                  | Royal Liverpool University Hospital | Liverpool, UK                            |                                                         | Recruiting Site                                                                            |
| Phil                              | Hopkins         |                       | MD               | King's College Hospital             | London, UK                               | Principal Investigator                                  | Recruiting Site                                                                            |
| John                              | Smith           |                       |                  | King's College Hospital             | London, UK                               | Research Nurse                                          | Recruiting Site                                                                            |
| Harriet                           | Noble           |                       |                  | King's College Hospital             | London, UK                               | Research Nurse                                          | Recruiting Site                                                                            |
| Evita                             | Pappa           |                       |                  | King's College Hospital             | London, UK                               | Research Nurse                                          | Recruiting Site                                                                            |
| Clare                             | Finney          |                       |                  | King's College Hospital             | London, UK                               | Research Nurse                                          | Recruiting Site                                                                            |
| Sinead                            | Heyler          |                       |                  | King's College Hospital             | London, UK                               | Research Nurse                                          | Recruiting Site                                                                            |
| Emma                              | Clarey          |                       |                  | King's College Hospital             | London, UK                               | Research Nurse                                          | Recruiting Site                                                                            |
| Maeve                             | Cockrell        |                       |                  | King's College Hospital             | London, UK                               | Research Nurse                                          | Recruiting Site                                                                            |
| Maria                             | Therese Depante |                       |                  | King's College Hospital             | London, UK                               | Research Nurse                                          | Recruiting Site                                                                            |
| Kevin                             | O'Reilly        |                       |                  | King's College Hospital             | London, UK                               | Research Nurse                                          | Recruiting Site                                                                            |
| Christopher                       | Waterhouse      |                       |                  | King's College Hospital             | London, UK                               |                                                         | Recruiting Site                                                                            |
| Vicky                             | Chu             |                       |                  | King's College Hospital             | London, UK                               |                                                         | Recruiting Site                                                                            |
| Joanne                            | Gordon          |                       |                  | King's College Hospital             | London, UK                               |                                                         | Recruiting Site                                                                            |
| Greg                              | Marchant        |                       |                  | King's College Hospital             | London, UK                               |                                                         | Recruiting Site                                                                            |
| Stuart                            | Chandler        |                       |                  | King's College Hospital             | London, UK                               |                                                         | Recruiting Site                                                                            |
| Senait                            | Haile           |                       |                  | King's College Hospital             | London, UK                               |                                                         | Recruiting Site                                                                            |
| Joanna                            | Flanagan        |                       |                  | King's College Hospital             | London, UK                               |                                                         | Recruiting Site                                                                            |
| Gaynor                            | Notcheva        |                       |                  | King's College Hospital             | London, UK                               |                                                         | Recruiting Site                                                                            |
| Dom                               | Jimenez         |                       |                  | King's College Hospital             | London, UK                               |                                                         | Recruiting Site                                                                            |
| Dilbagh                           | Gill            |                       |                  | King's College Hospital             | London, UK                               |                                                         | Recruiting Site                                                                            |
| Sunil                             | Jamadarkhana    |                       | MD               | Lister Hospital                     | Stevenage, UK                            | Principal Investigator                                  | Recruiting Site                                                                            |
| Sunita                            | Gohil           |                       |                  | Lister Hospital                     | Stevenage, UK                            |                                                         | Recruiting Site                                                                            |
| Sura                              | Dabbagh         |                       |                  | Lister Hospital                     | Stevenage, UK                            |                                                         | Recruiting Site                                                                            |
| Katy-Jane                         | Chick           |                       |                  | Lister Hospital                     | Stevenage, UK                            |                                                         | Recruiting Site                                                                            |
| Carina                            | Cruz            |                       |                  | Lister Hospital                     | Stevenage, UK                            |                                                         | Recruiting Site                                                                            |
| Vikram                            | Anumakonda      |                       | MD               | Russells Hall Hospital              | Dudley, UK                               | Principal Investigator                                  | Recruiting Site                                                                            |
| Vanessa                           | Moore           |                       |                  | Russells Hall Hospital              | Dudley, UK                               | Pharmacist                                              | Recruiting Site                                                                            |
| Lisa                              | Stanton         |                       |                  | Russells Hall Hospital              | Dudley, UK                               | Pharmacy Technician                                     | Recruiting Site                                                                            |
| Sharon                            | Westwood        |                       |                  | Russells Hall Hospital              | Dudley, UK                               | Pharmacy Technician                                     | Recruiting Site                                                                            |
| Jacqueline                        | Smith           |                       |                  | Russells Hall Hospital              | Dudley, UK                               |                                                         | Recruiting Site                                                                            |

## Supplemental Online Content: Nonauthor Collaborators

\*First name, last name, and suffix (if applicable) are required and will appear in PubMed.

| *First Name and Middle Initial(s) | *Last Name          | *Suffix (eg, Jr, III) | Academic Degrees | Institution                         | Location (city, state/province, country) | Role or Contribution, eg, chair, principal investigator | Group (if more than 1 Group listed in the byline) and/or Subgroup (eg, Steering Committee) |
|-----------------------------------|---------------------|-----------------------|------------------|-------------------------------------|------------------------------------------|---------------------------------------------------------|--------------------------------------------------------------------------------------------|
| Karen                             | Reid                |                       |                  | Russells Hall Hospital              | Dudley, UK                               | Research Nurse                                          | Recruiting Site                                                                            |
| Ranjit                            | Gidda               |                       |                  | Russells Hall Hospital              | Dudley, UK                               |                                                         | Recruiting Site                                                                            |
| Elena                             | Anastasescu         |                       |                  | Russells Hall Hospital              | Dudley, UK                               |                                                         | Recruiting Site                                                                            |
| Karim                             | Salem               |                       |                  | Russells Hall Hospital              | Dudley, UK                               |                                                         | Recruiting Site                                                                            |
| Mohamed                           | Mooradun            |                       |                  | Russells Hall Hospital              | Dudley, UK                               |                                                         | Recruiting Site                                                                            |
| Michael                           | Reay                |                       |                  | Russells Hall Hospital              | Dudley, UK                               |                                                         | Recruiting Site                                                                            |
| Nasirul                           | Ekbal               |                       | MD               | Royal Free Hospital                 | London, UK                               | Principal Investigator                                  | Recruiting Site                                                                            |
| Margaret                          | McNeil              |                       |                  | Royal Free Hospital                 | London, UK                               |                                                         | Recruiting Site                                                                            |
| Helder                            | Filipe              |                       |                  | Royal Free Hospital                 | London, UK                               |                                                         | Recruiting Site                                                                            |
| Aarti                             | Nandani             |                       |                  | Royal Free Hospital                 | London, UK                               |                                                         | Recruiting Site                                                                            |
| Glykeria                          | Pakou               |                       |                  | Royal Free Hospital                 | London, UK                               |                                                         | Recruiting Site                                                                            |
| Mark                              | de Neef             |                       |                  | Royal Free Hospital                 | London, UK                               |                                                         | Recruiting Site                                                                            |
| Sara                              | Mingo               |                       |                  | Royal Free Hospital                 | London, UK                               |                                                         | Recruiting Site                                                                            |
| Amitaa                            | Maharajh            |                       |                  | Royal Free Hospital                 | London, UK                               |                                                         | Recruiting Site                                                                            |
| Prashanth                         | Nandhabalan         |                       |                  | Royal Free Hospital                 | London, UK                               |                                                         | Recruiting Site                                                                            |
| Thomas                            | Billyard            |                       | MD               | University Hospitals Coventry and W | Coventry, UK                             | Principal Investigator                                  | Recruiting Site                                                                            |
| Laura                             | Wild                |                       |                  | University Hospitals Coventry and W | Coventry, UK                             |                                                         | Recruiting Site                                                                            |
| Pamela                            | Bremmer             |                       |                  | University Hospitals Coventry and W | Coventry, UK                             |                                                         | Recruiting Site                                                                            |
| Geraldine                         | Ward                |                       |                  | University Hospitals Coventry and W | Coventry, UK                             |                                                         | Recruiting Site                                                                            |
| Fiona                             | McGurk              |                       |                  | University Hospitals Coventry and W | Coventry, UK                             |                                                         | Recruiting Site                                                                            |
| Rajbinder                         | Deol                |                       |                  | University Hospitals Coventry and W | Coventry, UK                             |                                                         | Recruiting Site                                                                            |
| Catherine                         | Morgan              |                       |                  | University Hospitals Coventry and W | Coventry, UK                             |                                                         | Recruiting Site                                                                            |
| Kirandeep                         | Pachoo              |                       |                  | University Hospitals Coventry and W | Coventry, UK                             |                                                         | Recruiting Site                                                                            |
| Barbara                           | Phillips            |                       | MD               | Royal Sussex County Hospital        | Brighton, UK                             | Principal Investigator                                  | Recruiting Site                                                                            |
| Owen                              | Boyd                |                       | MD               | Royal Sussex County Hospital        | Brighton, UK                             | Sub-Investigator                                        | Recruiting Site                                                                            |
| Claire                            | Phillips            |                       |                  | Royal Sussex County Hospital        | Brighton, UK                             |                                                         | Recruiting Site                                                                            |
| Rakhee                            | Hindocha            |                       |                  | Royal Sussex County Hospital        | Brighton, UK                             |                                                         | Recruiting Site                                                                            |
| Stephen                           | Age                 |                       |                  | Royal Sussex County Hospital        | Brighton, UK                             |                                                         | Recruiting Site                                                                            |
| John                              | Porter              |                       |                  | Royal Sussex County Hospital        | Brighton, UK                             |                                                         | Recruiting Site                                                                            |
| Alex                              | Harrison            |                       |                  | Royal Sussex County Hospital        | Brighton, UK                             |                                                         | Recruiting Site                                                                            |
| Lynn                              | Evans               |                       |                  | Royal Sussex County Hospital        | Brighton, UK                             |                                                         | Recruiting Site                                                                            |
| Louise                            | Ortiz-Ruiz de Gordo |                       |                  | Royal Sussex County Hospital        | Brighton, UK                             |                                                         | Recruiting Site                                                                            |
| Dominika                          | Wlazly              |                       |                  | Royal Sussex County Hospital        | Brighton, UK                             |                                                         | Recruiting Site                                                                            |
| Tomas                             | Anews               |                       |                  | Royal Sussex County Hospital        | Brighton, UK                             |                                                         | Recruiting Site                                                                            |

## Supplemental Online Content: Nonauthor Collaborators

\*First name, last name, and suffix (if applicable) are required and will appear in PubMed.

| *First Name and Middle Initial(s) | *Last Name        | *Suffix (eg, Jr, III) | Academic Degrees | Institution                       | Location (city, state/province, country) | Role or Contribution, eg, chair, principal investigator | Group (if more than 1 Group listed in the byline) and/or Subgroup (eg, Steering Committee) |
|-----------------------------------|-------------------|-----------------------|------------------|-----------------------------------|------------------------------------------|---------------------------------------------------------|--------------------------------------------------------------------------------------------|
| Jess                              | West              |                       |                  | Royal Sussex County Hospital      | Brighton, UK                             |                                                         | Recruiting Site                                                                            |
| Ben                               | Attwood           |                       | MD               | South Warwickshire NHS Foundation | Warwick, UK                              | Principal Investigator                                  | Recruiting Site                                                                            |
| Paul                              | Jefferson         |                       | MD               | South Warwickshire NHS Foundation | Warwick, UK                              | Co-Principal Investigator                               | Recruiting Site                                                                            |
| Penny                             | Parsons           |                       |                  | South Warwickshire NHS Foundation | Warwick, UK                              | Research Nurse                                          | Recruiting Site                                                                            |
| Sophie                            | Mason             |                       |                  | South Warwickshire NHS Foundation | Warwick, UK                              | Research Nurse                                          | Recruiting Site                                                                            |
| Bridget                           | Campbell          |                       |                  | South Warwickshire NHS Foundation | Warwick, UK                              | Research Nurse                                          | Recruiting Site                                                                            |
| Julia                             | Jones             |                       |                  | South Warwickshire NHS Foundation | Warwick, UK                              | Pharmacy Technician                                     | Recruiting Site                                                                            |
| Kathryn                           | Webb              |                       |                  | South Warwickshire NHS Foundation | Warwick, UK                              |                                                         | Recruiting Site                                                                            |
| Karen                             | Spicer            |                       |                  | South Warwickshire NHS Foundation | Warwick, UK                              |                                                         | Recruiting Site                                                                            |
| Angela                            | Day               |                       |                  | South Warwickshire NHS Foundation | Warwick, UK                              |                                                         | Recruiting Site                                                                            |
| Camilla                           | Stagg             |                       |                  | South Warwickshire NHS Foundation | Warwick, UK                              | Research Nurse                                          | Recruiting Site                                                                            |
| Noor                              | Ayesha Shah       |                       |                  | South Warwickshire NHS Foundation | Warwick, UK                              |                                                         | Recruiting Site                                                                            |
| Ian                               | Purcell           |                       |                  | South Warwickshire NHS Foundation | Warwick, UK                              |                                                         | Recruiting Site                                                                            |
| Lucy                              | Shafiq            |                       |                  | South Warwickshire NHS Foundation | Warwick, UK                              |                                                         | Recruiting Site                                                                            |
| Coralie                           | Carle             |                       |                  | Peterborough City Hospital        | Peterborough, UK                         | Principal Investigator                                  | Recruiting Site                                                                            |
| Rebecca                           | Chilvers          |                       |                  | Peterborough City Hospital        | Peterborough, UK                         |                                                         | Recruiting Site                                                                            |
| Heather                           | MacColl           |                       |                  | Peterborough City Hospital        | Peterborough, UK                         |                                                         | Recruiting Site                                                                            |
| Alan                              | Pope              |                       |                  | Peterborough City Hospital        | Peterborough, UK                         |                                                         | Recruiting Site                                                                            |
| Anew                              | Holder            |                       |                  | Peterborough City Hospital        | Peterborough, UK                         |                                                         | Recruiting Site                                                                            |
| Nicola                            | Butterworth-Cowin |                       |                  | Peterborough City Hospital        | Peterborough, UK                         |                                                         | Recruiting Site                                                                            |
| Matthew                           | Davies            |                       |                  | Peterborough City Hospital        | Peterborough, UK                         |                                                         | Recruiting Site                                                                            |
| Louise                            | Wilmer            |                       |                  | Peterborough City Hospital        | Peterborough, UK                         |                                                         | Recruiting Site                                                                            |
| Nadeem                            | Ismail            |                       |                  | Peterborough City Hospital        | Peterborough, UK                         |                                                         | Recruiting Site                                                                            |
| Sneha                             | Gurung            |                       |                  | Peterborough City Hospital        | Peterborough, UK                         |                                                         | Recruiting Site                                                                            |
| Piers                             | Murphy            |                       |                  | Peterborough City Hospital        | Peterborough, UK                         |                                                         | Recruiting Site                                                                            |
| Toby                              | Elkington         |                       |                  | Peterborough City Hospital        | Peterborough, UK                         |                                                         | Recruiting Site                                                                            |
| Matthew                           | Camilleri         |                       |                  | Peterborough City Hospital        | Peterborough, UK                         |                                                         | Recruiting Site                                                                            |
| Rob                               | Charnock          |                       | MD               | Craigavon Area Hospital           | Portadown, UK                            | Principal Investigator                                  | Recruiting Site                                                                            |
| Claire                            | Shevlin           |                       | MD               | Craigavon Area Hospital           | Portadown, UK                            | Sub-Investigator                                        | Recruiting Site                                                                            |
| Emma                              | McGregor          |                       |                  | Craigavon Area Hospital           | Portadown, UK                            |                                                         | Recruiting Site                                                                            |
| Chris                             | Clarke            |                       |                  | Craigavon Area Hospital           | Portadown, UK                            |                                                         | Recruiting Site                                                                            |
| Judith                            | Hinds             |                       |                  | Craigavon Area Hospital           | Portadown, UK                            |                                                         | Recruiting Site                                                                            |
| Sophie                            | Hughes            |                       |                  | Craigavon Area Hospital           | Portadown, UK                            |                                                         | Recruiting Site                                                                            |
| Raymond                           | McKee             |                       |                  | Craigavon Area Hospital           | Portadown, UK                            |                                                         | Recruiting Site                                                                            |

## Supplemental Online Content: Nonauthor Collaborators

\*First name, last name, and suffix (if applicable) are required and will appear in PubMed.

| *First Name and Middle Initial(s) | *Last Name    | *Suffix (eg, Jr, III) | Academic Degrees | Institution                        | Location (city, state/province, country) | Role or Contribution, eg, chair, principal investigator | Group (if more than 1 Group listed in the byline) and/or Subgroup (eg, Steering Committee) |
|-----------------------------------|---------------|-----------------------|------------------|------------------------------------|------------------------------------------|---------------------------------------------------------|--------------------------------------------------------------------------------------------|
| Denise                            | McFarland     |                       |                  | Craigavon Area Hospital            | Portadown, UK                            | Research Nurse                                          | Recruiting Site                                                                            |
| Roisin                            | McNulty       |                       |                  | Craigavon Area Hospital            | Portadown, UK                            | Pharmacist                                              | Recruiting Site                                                                            |
| Andy                              | Breen         |                       | MD               | Leeds Teaching Hospitals NHS Trust | Leeds, UK                                | Principal Investigator                                  | Recruiting Site                                                                            |
| Elizabeth                         | Wilby         |                       |                  | Leeds Teaching Hospitals NHS Trust | Leeds, UK                                |                                                         | Recruiting Site                                                                            |
| Nora                              | Youngs        |                       |                  | Leeds Teaching Hospitals NHS Trust | Leeds, UK                                |                                                         | Recruiting Site                                                                            |
| Richard                           | French        |                       |                  | Leeds Teaching Hospitals NHS Trust | Leeds, UK                                |                                                         | Recruiting Site                                                                            |
| Suzie                             | Colquhoun     |                       |                  | Leeds Teaching Hospitals NHS Trust | Leeds, UK                                |                                                         | Recruiting Site                                                                            |
| Claire                            | Posnett       |                       |                  | Leeds Teaching Hospitals NHS Trust | Leeds, UK                                |                                                         | Recruiting Site                                                                            |
| Clare                             | Howcroft      |                       |                  | Leeds Teaching Hospitals NHS Trust | Leeds, UK                                |                                                         | Recruiting Site                                                                            |
| Anew                              | Taylor        |                       |                  | Leeds Teaching Hospitals NHS Trust | Leeds, UK                                |                                                         | Recruiting Site                                                                            |
| Simon                             | Whiteley      |                       |                  | Leeds Teaching Hospitals NHS Trust | Leeds, UK                                |                                                         | Recruiting Site                                                                            |
| Bethan                            | Ogg           |                       |                  | Leeds Teaching Hospitals NHS Trust | Leeds, UK                                |                                                         | Recruiting Site                                                                            |
| Kate                              | Long          |                       |                  | Leeds Teaching Hospitals NHS Trust | Leeds, UK                                |                                                         | Recruiting Site                                                                            |
| Alicia                            | Tomkinson     |                       |                  | Leeds Teaching Hospitals NHS Trust | Leeds, UK                                |                                                         | Recruiting Site                                                                            |
| Ian                               | Clement       |                       |                  | Royal Victoria Infirmary Newcastle | Newcastle, UK                            | Principal Investigator                                  | Recruiting Site                                                                            |
| Tara                              | Shrestha      |                       |                  | Royal Victoria Infirmary Newcastle | Newcastle, UK                            |                                                         | Recruiting Site                                                                            |
| Leigh                             | Dunn          |                       |                  | Royal Victoria Infirmary Newcastle | Newcastle, UK                            |                                                         | Recruiting Site                                                                            |
| Verity                            | Calder        |                       |                  | Royal Victoria Infirmary Newcastle | Newcastle, UK                            |                                                         | Recruiting Site                                                                            |
| Maite                             | Babio-Galan   |                       |                  | Royal Victoria Infirmary Newcastle | Newcastle, UK                            |                                                         | Recruiting Site                                                                            |
| Kimberley                         | Zwiggelaar    |                       |                  | Royal Victoria Infirmary Newcastle | Newcastle, UK                            |                                                         | Recruiting Site                                                                            |
| Anne                              | Mitchell      |                       |                  | Royal Victoria Infirmary Newcastle | Newcastle, UK                            |                                                         | Recruiting Site                                                                            |
| Julie                             | Stephenson    |                       |                  | Royal Victoria Infirmary Newcastle | Newcastle, UK                            |                                                         | Recruiting Site                                                                            |
| Lesley                            | Rigden        |                       |                  | Royal Victoria Infirmary Newcastle | Newcastle, UK                            |                                                         | Recruiting Site                                                                            |
| Jude                              | Davison       |                       |                  | Royal Victoria Infirmary Newcastle | Newcastle, UK                            |                                                         | Recruiting Site                                                                            |
| Joseph                            | Carter        |                       |                  | York Hospital                      | York, UK                                 | Principal Investigator                                  | Recruiting Site                                                                            |
| Kate                              | Howard        |                       |                  | York Hospital                      | York, UK                                 |                                                         | Recruiting Site                                                                            |
| Hazel                             | Cahill        |                       |                  | York Hospital                      | York, UK                                 |                                                         | Recruiting Site                                                                            |
| Lia                               | Grainger      |                       |                  | York Hospital                      | York, UK                                 |                                                         | Recruiting Site                                                                            |
| Poppy                             | Cottrell-Howe |                       |                  | York Hospital                      | York, UK                                 |                                                         | Recruiting Site                                                                            |
| Abigail                           | Rowbotham     |                       |                  | York Hospital                      | York, UK                                 |                                                         | Recruiting Site                                                                            |
| Laura                             | Jeffery       |                       |                  | York Hospital                      | York, UK                                 |                                                         | Recruiting Site                                                                            |
| Emily                             | Waterman      |                       |                  | York Hospital                      | York, UK                                 |                                                         | Recruiting Site                                                                            |
| Arran                             | Fletcher      |                       |                  | York Hospital                      | York, UK                                 |                                                         | Recruiting Site                                                                            |
| Zoe                               | Guy           |                       |                  | York Hospital                      | York, UK                                 |                                                         | Recruiting Site                                                                            |

## Supplemental Online Content: Nonauthor Collaborators

\*First name, last name, and suffix (if applicable) are required and will appear in PubMed.

| *First Name and Middle Initial(s) | *Last Name       | *Suffix (eg, Jr, III) | Academic Degrees | Institution                        | Location (city, state/province, country) | Role or Contribution, eg, chair, principal investigator | Group (if more than 1 Group listed in the byline) and/or Subgroup (eg, Steering Committee) |
|-----------------------------------|------------------|-----------------------|------------------|------------------------------------|------------------------------------------|---------------------------------------------------------|--------------------------------------------------------------------------------------------|
| Isabel                            | Birkinshaw       |                       |                  | York Hospital                      | York, UK                                 |                                                         | Recruiting Site                                                                            |
| Jo                                | Ingham           |                       |                  | York Hospital                      | York, UK                                 |                                                         | Recruiting Site                                                                            |
| Zoe                               | Scott            |                       |                  | York Hospital                      | York, UK                                 |                                                         | Recruiting Site                                                                            |
| Samantha                          | Stead            |                       |                  | York Hospital                      | York, UK                                 |                                                         | Recruiting Site                                                                            |
| Raha                              | West             |                       |                  | The Royal Buckinghamshire Hospital | Aylesbury, UK                            | Principal Investigator                                  | Recruiting Site                                                                            |
| Pradeep                           | Shanmugasundaram |                       |                  | The Royal Buckinghamshire Hospital | Aylesbury, UK                            |                                                         | Recruiting Site                                                                            |
| Judith                            | Abrams           |                       |                  | The Royal Buckinghamshire Hospital | Aylesbury, UK                            |                                                         | Recruiting Site                                                                            |
| Geraldine                         | Hambrook         |                       |                  | The Royal Buckinghamshire Hospital | Aylesbury, UK                            |                                                         | Recruiting Site                                                                            |
| Katarina                          | Manso            |                       |                  | The Royal Buckinghamshire Hospital | Aylesbury, UK                            |                                                         | Recruiting Site                                                                            |
| Sally                             | Scott            |                       |                  | The Royal Buckinghamshire Hospital | Aylesbury, UK                            |                                                         | Recruiting Site                                                                            |
| Iram                              | Husain           |                       |                  | The Royal Buckinghamshire Hospital | Aylesbury, UK                            |                                                         | Recruiting Site                                                                            |
| Evelyn                            | Chan             |                       |                  | The Royal Buckinghamshire Hospital | Aylesbury, UK                            |                                                         | Recruiting Site                                                                            |
| Siobhan                           | Gettings         |                       |                  | The Royal Buckinghamshire Hospital | Aylesbury, UK                            |                                                         | Recruiting Site                                                                            |
| Anil                              | Hormis           |                       | MD               | Rotherham District Hospital        | Rotherham, UK                            | Principal Investigator                                  | Recruiting Site                                                                            |
| Rachel                            | Walker           |                       |                  | Rotherham District Hospital        | Rotherham, UK                            | Research Nurse                                          | Recruiting Site                                                                            |
| Dawn                              | Collier          |                       |                  | Rotherham District Hospital        | Rotherham, UK                            | Research Nurse                                          | Recruiting Site                                                                            |
| Cheryl                            | Graham           |                       |                  | Rotherham District Hospital        | Rotherham, UK                            |                                                         | Recruiting Site                                                                            |
| Victoria                          | Murray           |                       |                  | Rotherham District Hospital        | Rotherham, UK                            |                                                         | Recruiting Site                                                                            |
| Katy                              | Curtis           |                       |                  | Rotherham District Hospital        | Rotherham, UK                            |                                                         | Recruiting Site                                                                            |
| Charlotte                         | Widdop           |                       |                  | Rotherham District Hospital        | Rotherham, UK                            |                                                         | Recruiting Site                                                                            |
| Sarah                             | Kimpton          |                       |                  | Rotherham District Hospital        | Rotherham, UK                            | Pharmacist                                              | Recruiting Site                                                                            |
| Susan                             | Oakley           |                       |                  | Rotherham District Hospital        | Rotherham, UK                            | Pharmacy Technician                                     | Recruiting Site                                                                            |
| Zirlish                           | Afzal            |                       |                  | Rotherham District Hospital        | Rotherham, UK                            |                                                         | Recruiting Site                                                                            |
| James                             | Varley           |                       | MD               | Addenbrookes Hospital              | Cambridge, UK                            | Principal Investigator                                  | Recruiting Site                                                                            |
| Petra                             | Polgarova        |                       | MD               | Addenbrookes Hospital              | Cambridge, UK                            | Sub-Investigator                                        | Recruiting Site                                                                            |
| Andrew                            | Johnston         |                       | MD               | Addenbrookes Hospital              | Cambridge, UK                            | Sub-Investigator                                        | Recruiting Site                                                                            |
| Lynne                             | Whitehead        |                       | MD               | Addenbrookes Hospital              | Cambridge, UK                            | Sub-Investigator                                        | Recruiting Site                                                                            |
| Andrew                            | Conway Morris    |                       | MD               | Addenbrookes Hospital              | Cambridge, UK                            | Sub-Investigator                                        | Recruiting Site                                                                            |
| Razeen                            | Mahroof          |                       |                  | Addenbrookes Hospital              | Cambridge, UK                            |                                                         | Recruiting Site                                                                            |
| Sofia                             | Teixeira         |                       |                  | Addenbrookes Hospital              | Cambridge, UK                            |                                                         | Recruiting Site                                                                            |
| Nazrudeen                         | Ali              |                       | MD               | Northampton General Hospital       | Northampton, UK                          | Principal Investigator                                  | Recruiting Site                                                                            |
| Jonny                             | Wilkinson        |                       | MD               | Northampton General Hospital       | Northampton, UK                          | Sub-Investigator                                        | Recruiting Site                                                                            |
| Alex                              | Lyon             |                       |                  | Northampton General Hospital       | Northampton, UK                          |                                                         | Recruiting Site                                                                            |
| Charlotte                         | Mills            |                       |                  | Northampton General Hospital       | Northampton, UK                          |                                                         | Recruiting Site                                                                            |

## Supplemental Online Content: Nonauthor Collaborators

\*First name, last name, and suffix (if applicable) are required and will appear in PubMed.

| *First Name and Middle Initial(s) | *Last Name  | *Suffix (eg, Jr, III) | Academic Degrees | Institution                      | Location (city, state/province, country) | Role or Contribution, eg, chair, principal investigator | Group (if more than 1 Group listed in the byline) and/or Subgroup (eg, Steering Committee) |
|-----------------------------------|-------------|-----------------------|------------------|----------------------------------|------------------------------------------|---------------------------------------------------------|--------------------------------------------------------------------------------------------|
| Kathryn                           | Hall        |                       |                  | Northampton General Hospital     | Northampton, UK                          | Senior Research Nurse                                   | Recruiting Site                                                                            |
| Gayna                             | Grantham    |                       |                  | Northampton General Hospital     | Northampton, UK                          |                                                         | Recruiting Site                                                                            |
| Lorraine                          | Campey      |                       |                  | Northampton General Hospital     | Northampton, UK                          |                                                         | Recruiting Site                                                                            |
| Helen                             | Cronshaw    |                       |                  | Northampton General Hospital     | Northampton, UK                          |                                                         | Recruiting Site                                                                            |
| Livia                             | Malanjum    |                       |                  | Northampton General Hospital     | Northampton, UK                          |                                                         | Recruiting Site                                                                            |
| Lucy                              | Dudgeon     |                       |                  | Northampton General Hospital     | Northampton, UK                          | Senior Research Nurse                                   | Recruiting Site                                                                            |
| Clare                             | Hinchley    |                       |                  | Northampton General Hospital     | Northampton, UK                          |                                                         | Recruiting Site                                                                            |
| Stephen                           | Langhon     |                       |                  | Northampton General Hospital     | Northampton, UK                          |                                                         | Recruiting Site                                                                            |
| Jane                              | Hosea       |                       |                  | Northampton General Hospital     | Northampton, UK                          | Pharmacist                                              | Recruiting Site                                                                            |
| Anea                              | Hillyer     |                       |                  | Northampton General Hospital     | Northampton, UK                          |                                                         | Recruiting Site                                                                            |
| Rachel                            | Kontogonis  |                       |                  | Northampton General Hospital     | Northampton, UK                          |                                                         | Recruiting Site                                                                            |
| Oninye                            | Ndefo       |                       |                  | Northampton General Hospital     | Northampton, UK                          |                                                         | Recruiting Site                                                                            |
| Laura                             | Robinson    |                       |                  | Northampton General Hospital     | Northampton, UK                          |                                                         | Recruiting Site                                                                            |
| Callum                            | Kaye        |                       | MD               | Aberdeen Royal Infirmary         | Aberdeen, UK                             | Principal Investigator                                  | Recruiting Site                                                                            |
| Kevin                             | Sim         |                       |                  | Aberdeen Royal Infirmary         | Aberdeen, UK                             |                                                         | Recruiting Site                                                                            |
| Ian                               | Scott       |                       |                  | Aberdeen Royal Infirmary         | Aberdeen, UK                             |                                                         | Recruiting Site                                                                            |
| Teresa                            | Scott       |                       |                  | Aberdeen Royal Infirmary         | Aberdeen, UK                             | Critical Care Follow-up, research and audit nurse       |                                                                                            |
| Felicity                          | Anderson    |                       |                  | Aberdeen Royal Infirmary         | Aberdeen, UK                             |                                                         | Recruiting Site                                                                            |
| Wendy                             | Mitchell    |                       |                  | Aberdeen Royal Infirmary         | Aberdeen, UK                             | Staff Nurse                                             | Recruiting Site                                                                            |
| Patricia                          | Cooper      |                       |                  | Aberdeen Royal Infirmary         | Aberdeen, UK                             |                                                         | Recruiting Site                                                                            |
| James                             | MacBrayne   |                       |                  | Aberdeen Royal Infirmary         | Aberdeen, UK                             |                                                         | Recruiting Site                                                                            |
| Fiona                             | Willox      |                       |                  | Aberdeen Royal Infirmary         | Aberdeen, UK                             | Critical Care Nurse                                     | Recruiting Site                                                                            |
| Kate                              | Richmond    |                       |                  | Aberdeen Royal Infirmary         | Aberdeen, UK                             |                                                         | Recruiting Site                                                                            |
| Rebecca                           | Colleron    |                       |                  | Aberdeen Royal Infirmary         | Aberdeen, UK                             |                                                         | Recruiting Site                                                                            |
| Erin                              | Trumper     |                       |                  | Aberdeen Royal Infirmary         | Aberdeen, UK                             |                                                         | Recruiting Site                                                                            |
| Bartosz                           | Was         |                       |                  | Aberdeen Royal Infirmary         | Aberdeen, UK                             |                                                         | Recruiting Site                                                                            |
| Michael                           | Christie    |                       |                  | Aberdeen Royal Infirmary         | Aberdeen, UK                             |                                                         | Recruiting Site                                                                            |
| Amber                             | Johnson     |                       |                  | Aberdeen Royal Infirmary         | Aberdeen, UK                             |                                                         | Recruiting Site                                                                            |
| Gillian                           | Price       |                       |                  | Aberdeen Royal Infirmary         | Aberdeen, UK                             |                                                         | Recruiting Site                                                                            |
| Malcolm                           | Sim         |                       | MD               | Queen Elizabeth Hospital Glasgow | Glasgow, UK                              | Principal Investigator                                  | Recruiting Site                                                                            |
| Robert                            | Docking     |                       | MD               | Queen Elizabeth Hospital Glasgow | Glasgow, UK                              | Sub-Investigator                                        | Recruiting Site                                                                            |
| Scott                             | McQueen     |                       |                  | Queen Elizabeth Hospital Glasgow | Glasgow, UK                              |                                                         | Recruiting Site                                                                            |
| Sophie                            | Kennedy-Kay |                       |                  | Queen Elizabeth Hospital Glasgow | Glasgow, UK                              |                                                         | Recruiting Site                                                                            |
| Lynn                              | Abel        |                       |                  | Queen Elizabeth Hospital Glasgow | Glasgow, UK                              |                                                         | Recruiting Site                                                                            |

## Supplemental Online Content: Nonauthor Collaborators

\*First name, last name, and suffix (if applicable) are required and will appear in PubMed.

| *First Name and Middle Initial(s) | *Last Name         | *Suffix (eg, Jr, III) | Academic Degrees | Institution                       | Location (city, state/province, country) | Role or Contribution, eg, chair, principal investigator | Group (if more than 1 Group listed in the byline) and/or Subgroup (eg, Steering Committee) |
|-----------------------------------|--------------------|-----------------------|------------------|-----------------------------------|------------------------------------------|---------------------------------------------------------|--------------------------------------------------------------------------------------------|
| Sophie                            | Hughes             |                       |                  | Queen Elizabeth Hospital Glasgow  | Glasgow, UK                              |                                                         | Recruiting Site                                                                            |
| Steven                            | Henderson          |                       |                  | Queen Elizabeth Hospital Glasgow  | Glasgow, UK                              |                                                         | Recruiting Site                                                                            |
| Kirsty                            | McLeash            |                       |                  | Queen Elizabeth Hospital Glasgow  | Glasgow, UK                              |                                                         | Recruiting Site                                                                            |
| Anew                              | Gratrix            |                       |                  | Hull University Teaching Hospital | Hull, UK                                 | Principal Investigator                                  | Recruiting Site                                                                            |
| Victoria                          | Martinson          |                       |                  | Hull University Teaching Hospital | Hull, UK                                 |                                                         | Recruiting Site                                                                            |
| Louise                            | Foster             |                       |                  | Hull University Teaching Hospital | Hull, UK                                 |                                                         | Recruiting Site                                                                            |
| Elizabeth                         | Stones             |                       |                  | Hull University Teaching Hospital | Hull, UK                                 |                                                         | Recruiting Site                                                                            |
| Vicki                             | Lowthorpe          |                       |                  | Hull University Teaching Hospital | Hull, UK                                 |                                                         | Recruiting Site                                                                            |
| Daniel                            | Crawley            |                       |                  | Hull University Teaching Hospital | Hull, UK                                 |                                                         | Recruiting Site                                                                            |
| Susannah                          | Leaver             |                       |                  | St George's University Hospital   | London, UK                               | Principal Investigator                                  | Recruiting Site                                                                            |
| Sarah                             | Farnell Ward       |                       |                  | St George's University Hospital   | London, UK                               | Research Nurse                                          | Recruiting Site                                                                            |
| Romina                            | Pepermans Saluzzio |                       |                  | St George's University Hospital   | London, UK                               | Research Nurse                                          | Recruiting Site                                                                            |
| Frances                           | Robinson           |                       |                  | St George's University Hospital   | London, UK                               |                                                         | Recruiting Site                                                                            |
| Carlos                            | Delgado            |                       |                  | St George's University Hospital   | London, UK                               |                                                         | Recruiting Site                                                                            |
| Geraldine                         | Gray               |                       |                  | St George's University Hospital   | London, UK                               |                                                         | Recruiting Site                                                                            |
| Rebecca                           | Kanu               |                       |                  | St George's University Hospital   | London, UK                               |                                                         | Recruiting Site                                                                            |
| Robert                            | Oakley             |                       |                  | St George's University Hospital   | London, UK                               |                                                         | Recruiting Site                                                                            |
| Karen M.                          | Keates             |                       |                  | Service User Representative       |                                          | Service User Representative                             | Trial Steering Committee                                                                   |
| Tim                               | Walsh              |                       | MD               | University of Edinburgh           |                                          | TSC Chair                                               | Trial Steering Committee                                                                   |
