# Supplementary material
Source: PubMed Central journal article supplement (PMC10600724)
Supplement: jama-e2320134-s005.pdf [file jama-e2320134-s005.pdf]

## Data Sharing Statement

Whitehouse. Landiolol and Organ Failure in Patients With Septic Shock. *JAMA*. Published October 25, 2023. doi:10.1001/jama.2023.20134

### Data

**Data available:** Yes

**Data types:** Deidentified participant data

**How to access data:** Available on application to the chief investigators via email: Prof Tony Whitehouse ([Tony.Whitehouse@uhb.nhs.uk](mailto:Tony.Whitehouse@uhb.nhs.uk))

**When available:** With publication

### Supporting Documents

**Document types:** None

### Additional Information

**Who can access the data:** Researchers whose proposed use of the data has been approved

**Types of analyses:** For approved research purposes

**Mechanisms of data availability:** With investigator support, after approval of a proposal and with a signed data sharing agreement
